# Supplementary material for: Statistical regularization for trend detection: An integrated approach for detecting long-term trends from sparse tropospheric ozone profiles
Source: Copernicus journal article supplement (doi:10.5194/acp-2019-959), 2020-03-19
Supplement: Supplementary file 1 [file acp-2019-959-supplement.pdf]

# Supplemental Material for

## Statistical regularization for trend detection: An integrated approach for detecting long-term trends from sparse tropospheric ozone profiles

Kai-Lan Chang<sup>1, 2, \*</sup>, Owen R. Cooper<sup>1, 2</sup>, Audrey Gaudel<sup>1, 2</sup>, Irina Petropavlovskikh<sup>1, 3</sup> and Valérie Thouret<sup>4</sup>

<sup>1</sup>Cooperative Institute for Research in Environmental Sciences, University of Colorado, Boulder, CO, USA

<sup>2</sup>Chemical Sciences Division, NOAA Earth System Research Laboratory, Boulder, CO, USA

<sup>3</sup>Global Monitoring Division, NOAA Earth System Research Laboratory, Boulder, CO, USA

<sup>4</sup>Laboratoire d'Aérodologie, Université de Toulouse, CNRS, UPS, Toulouse, France

\*Corresponding author: kai-lan.chang@noaa.gov

### List of Tables

|     |                                                                                                                                                                                                                                              |   |
|-----|----------------------------------------------------------------------------------------------------------------------------------------------------------------------------------------------------------------------------------------------|---|
| S-1 | Trends and 2-sigma variabilities [in units of ppb decade <sup>-1</sup> ] based on the separated fit and integrated fit methods, with a reference to different starting year, above Hilo, Hawaii and Trinidad Head (THD), California. . . . . | 2 |
|-----|----------------------------------------------------------------------------------------------------------------------------------------------------------------------------------------------------------------------------------------------|---|

### List of Figures

|     |                                                                                                                                                                                                                                                                                                                                                                                |    |
|-----|--------------------------------------------------------------------------------------------------------------------------------------------------------------------------------------------------------------------------------------------------------------------------------------------------------------------------------------------------------------------------------|----|
| S-1 | As in Figure 2, but all observations made in the stratosphere have been removed. . . . .                                                                                                                                                                                                                                                                                       | 3  |
| S-2 | As in Figure 4, but all observations made in the stratosphere have been removed. . . . .                                                                                                                                                                                                                                                                                       | 4  |
| S-3 | As in Figure 5, but all observations made in the stratosphere have been removed. . . . .                                                                                                                                                                                                                                                                                       | 5  |
| S-4 | Sensitivity analysis at 550 hPa based on 1000 random samples of 1 (left), 5 (middle) and 9 (right) selected profiles per month. Shown are the sampled trend distributions with vertical lines indicating the trend values derived from the full data set (top), and the corresponding matched trend uncertainties based on the separated and integrated fits (bottom). . . . . | 6  |
| S-5 | Monthly mean ozone time series and model fitted values on 4 upper-level layers above NE China. . . . .                                                                                                                                                                                                                                                                         | 7  |
| S-6 | Monthly mean ozone time series and model fitted values on 4 lower-level layers above NE China. . . . .                                                                                                                                                                                                                                                                         | 8  |
| S-7 | (a) Interannual component for the ozone distribution and (b) trend estimates and associated 2-sigma variabilities at 20 hPa vertical resolution, based on the separated fit and integrated fit methods above Trinidad Head, California. . . . .                                                                                                                                | 9  |
| S-8 | (a) Interannual component for stratospheric ozone observation and (b) trend estimates and associated 2-sigma variabilities at 0.5 km vertical resolution, based on the separated fit and integrated fit methods above Hilo, Hawaii. . . . .                                                                                                                                    | 10 |

**Table S-1:** Trends and 2-sigma variabilities [in units of ppb decade<sup>-1</sup>] based on the separated fit and integrated fit methods, with a reference to different starting year, above Hilo, Hawaii and Trinidad Head (THD), California.

|                    |            | Separated fit |         |         | Integrated fit |         |         |
|--------------------|------------|---------------|---------|---------|----------------|---------|---------|
|                    |            | Trend         | 2-sigma | p-value | Trend          | 2-sigma | p-value |
| Hilo<br>Since 1982 | 700-300hPa | 1.11          | 0.83    | 0.01    | 1.12           | 0.78    | 0.01    |
|                    | 950-250hPa | 0.89          | 0.68    | 0.01    | 0.96           | 0.63    | <0.01   |
|                    | 950-800hPa | -0.25         | 0.70    | 0.47    | 0.02           | 0.56    | 0.95    |
|                    | 400-300hPa | 2.31          | 1.10    | <0.01   | 1.87           | 1.03    | <0.01   |
|                    | 650hPa     | 0.21          | 0.86    | 0.63    | 0.70           | 0.67    | 0.05    |
| Hilo<br>Since 1994 | 700-300hPa | 0.70          | 1.43    | 0.34    | 0.64           | 1.33    | 0.35    |
|                    | 950-250hPa | 0.63          | 1.11    | 0.27    | 0.59           | 1.07    | 0.29    |
|                    | 950-800hPa | 0.29          | 0.98    | 0.56    | 0.30           | 0.92    | 0.52    |
|                    | 400-300hPa | 1.11          | 1.73    | 0.21    | 0.98           | 1.61    | 0.24    |
|                    | 650hPa     | -0.05         | 1.34    | 0.94    | -0.03          | 1.22    | 0.96    |
| Hilo<br>Since 2000 | 700-300hPa | 0.07          | 2.01    | 0.95    | 0.04           | 1.83    | 0.96    |
|                    | 950-250hPa | 0.02          | 1.50    | 0.98    | -0.03          | 1.41    | 0.97    |
|                    | 950-800hPa | 0.07          | 1.12    | 0.91    | 0.09           | 1.11    | 0.87    |
|                    | 400-300hPa | 0.19          | 2.49    | 0.88    | -0.19          | 2.17    | 0.86    |
|                    | 650hPa     | -0.45         | 2.01    | 0.66    | -0.09          | 1.64    | 0.91    |
|                    |            | Separated fit |         |         | Integrated fit |         |         |
|                    |            | Trend         | 2-sigma | p-value | Trend          | 2-sigma | p-value |
| THD<br>Since 1998  | 700-300hPa | -2.46         | 2.45    | 0.06    | -2.45          | 2.19    | 0.04    |
|                    | 950-250hPa | -1.85         | 1.70    | 0.04    | -1.85          | 1.53    | 0.03    |
|                    | 950-800hPa | -0.81         | 0.90    | 0.09    | -0.82          | 0.79    | 0.05    |
|                    | 400-300hPa | -5.65         | 5.73    | 0.06    | -5.46          | 5.02    | 0.04    |
|                    | 650hPa     | -0.48         | 1.46    | 0.52    | -0.71          | 1.05    | 0.19    |
| THD<br>Since 2000  | 700-300hPa | -0.12         | 1.76    | 0.90    | -0.22          | 1.47    | 0.76    |
|                    | 950-250hPa | -0.25         | 1.28    | 0.70    | -0.33          | 1.09    | 0.55    |
|                    | 950-800hPa | -0.47         | 1.05    | 0.38    | -0.52          | 0.92    | 0.28    |
|                    | 400-300hPa | -0.19         | 3.90    | 0.93    | -0.32          | 3.04    | 0.84    |
|                    | 650hPa     | -0.32         | 1.72    | 0.71    | -0.41          | 1.19    | 0.50    |

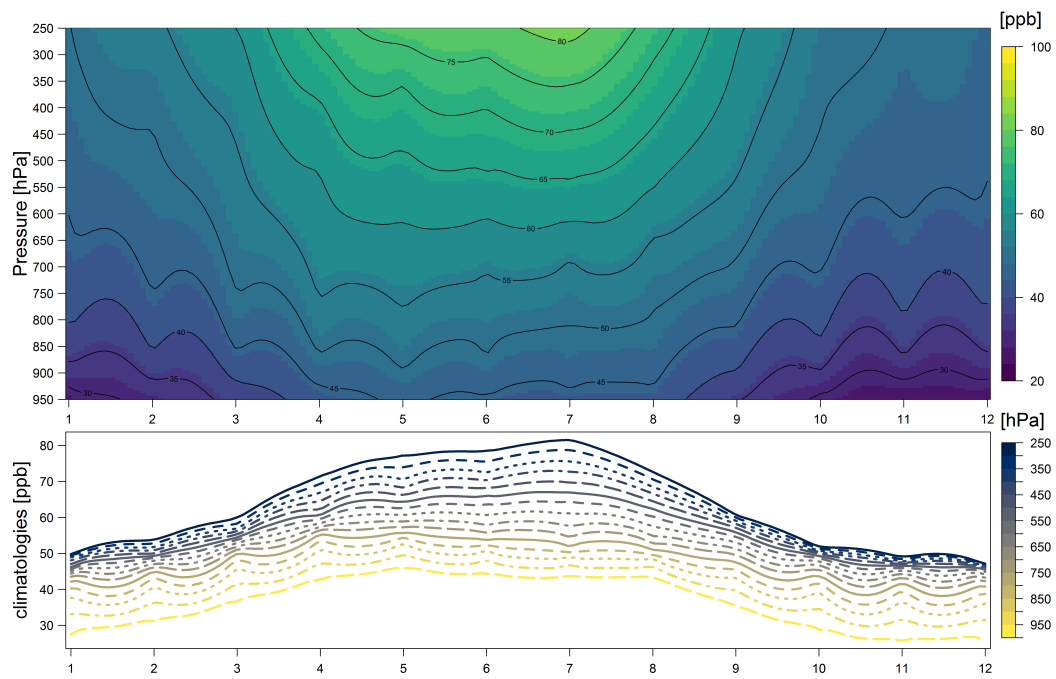

(a) Seasonal component

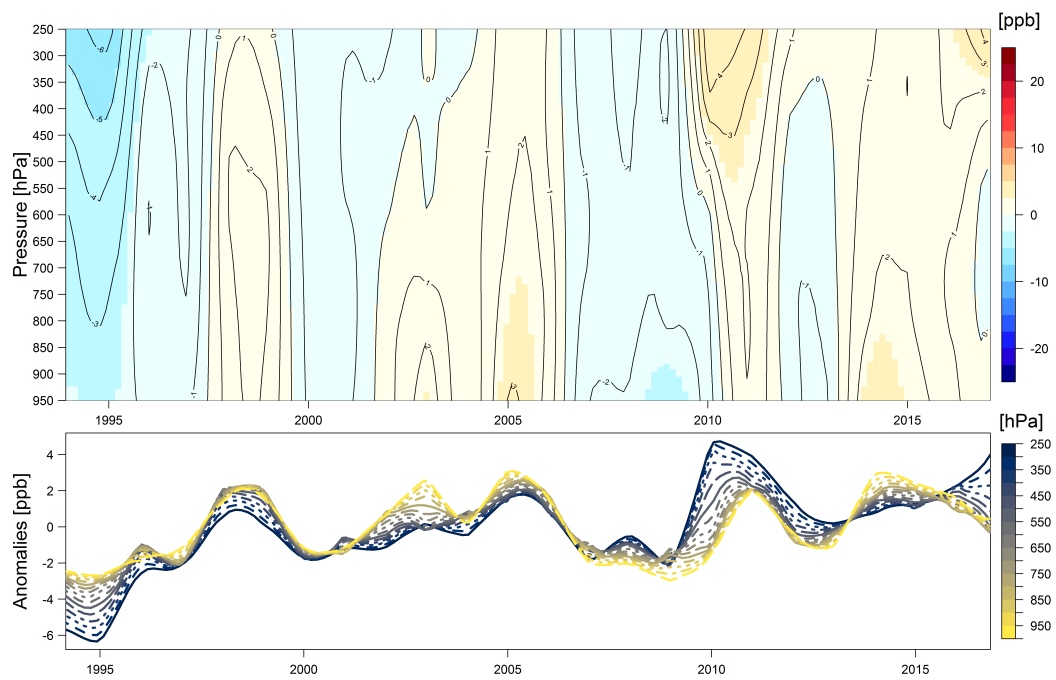

(b) Interannual component

**Figure S-1:** As in Figure 2, but all observations made in the stratosphere have been removed.

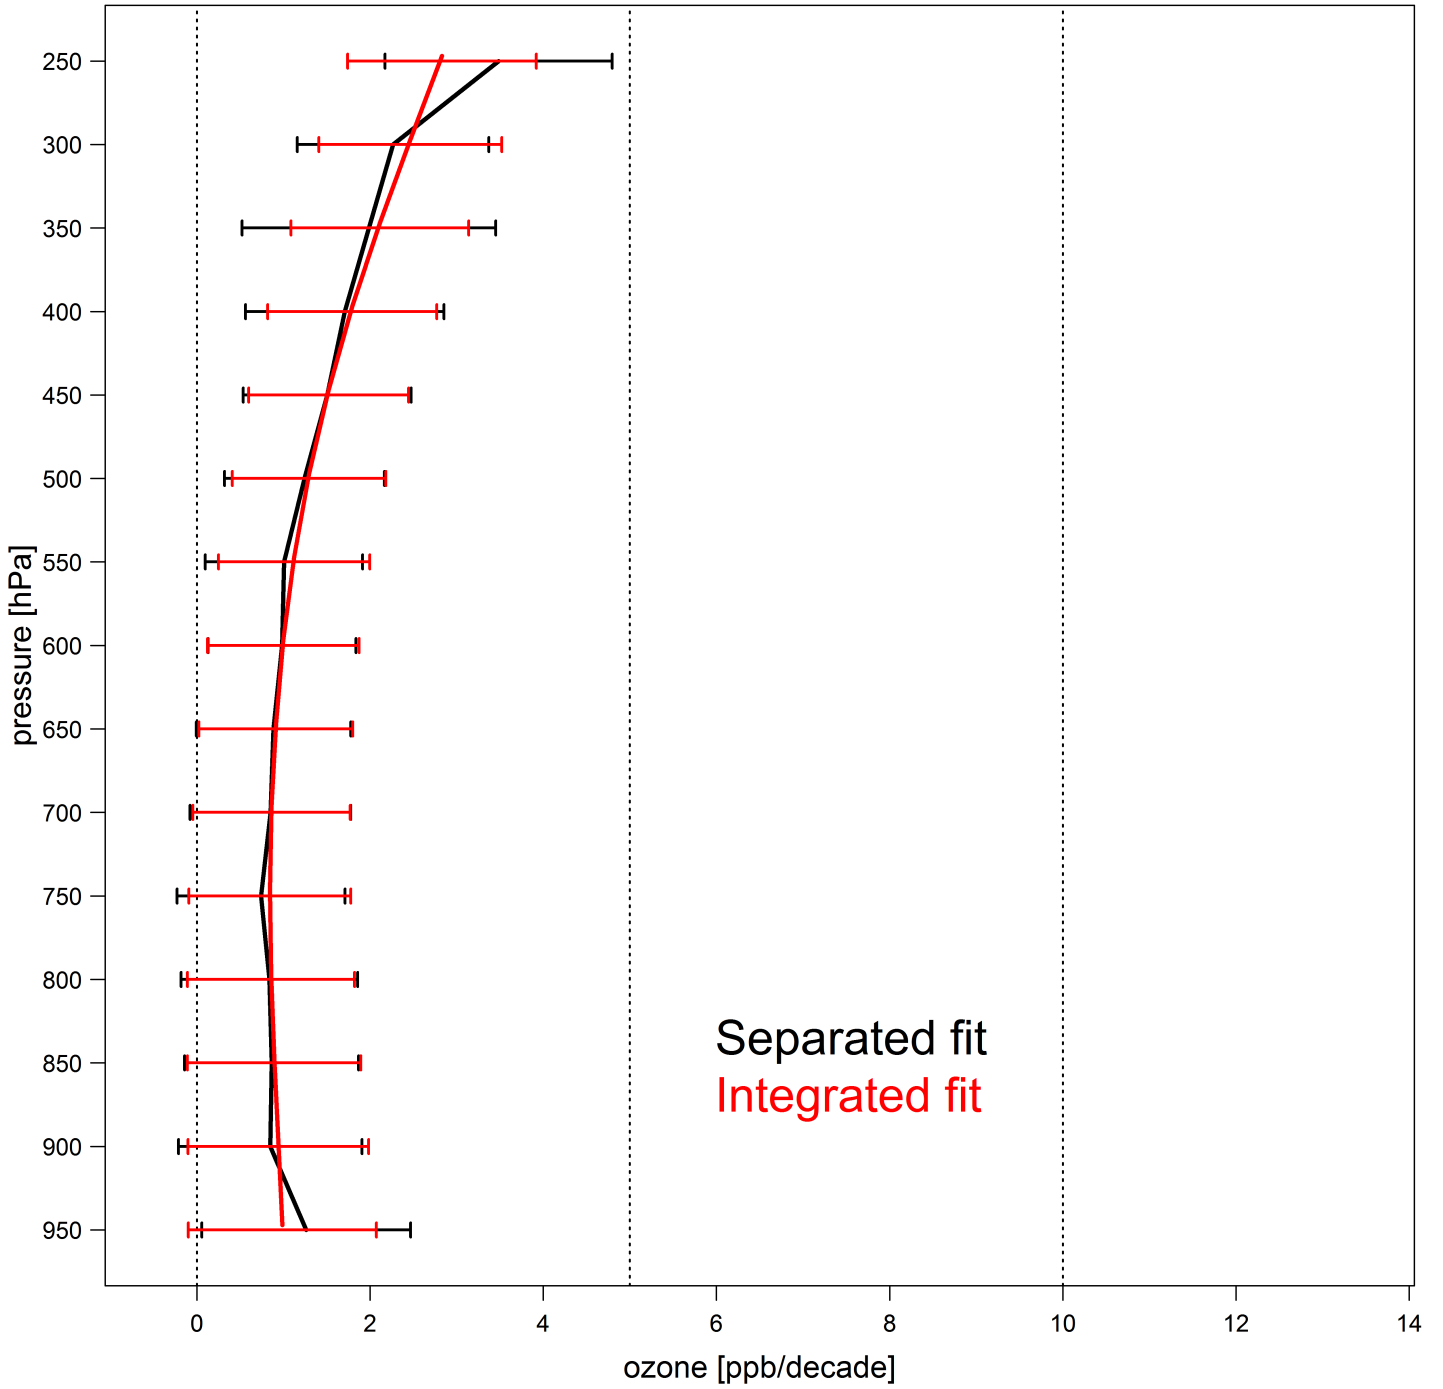

**Figure S-2:** As in Figure 4, but all observations made in the stratosphere have been removed.

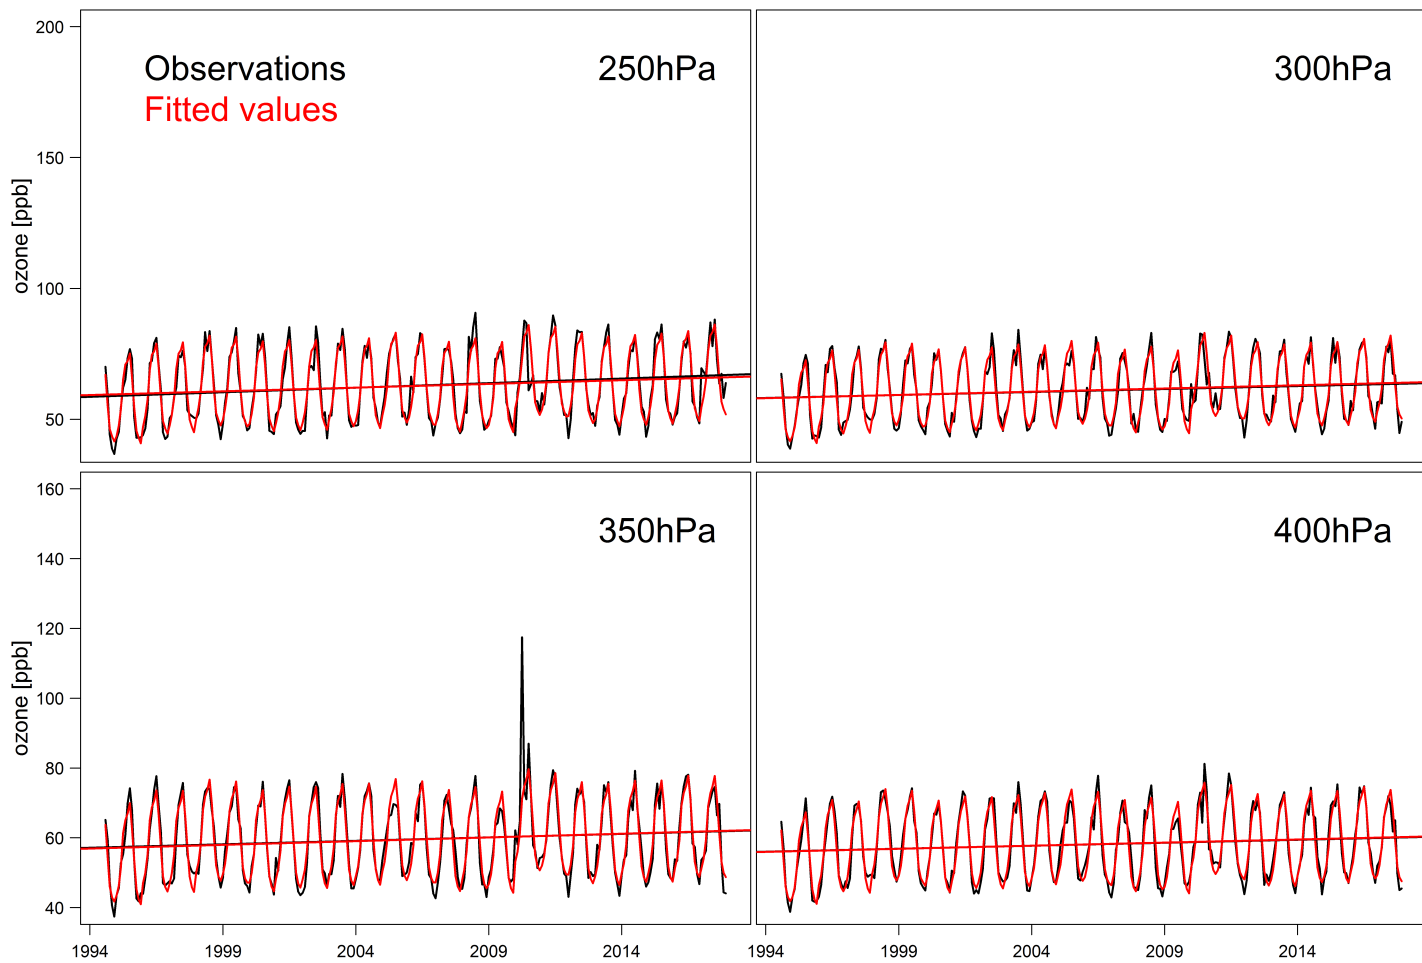

**Figure S-3:** As in Figure 5, but all observations made in the stratosphere have been removed.

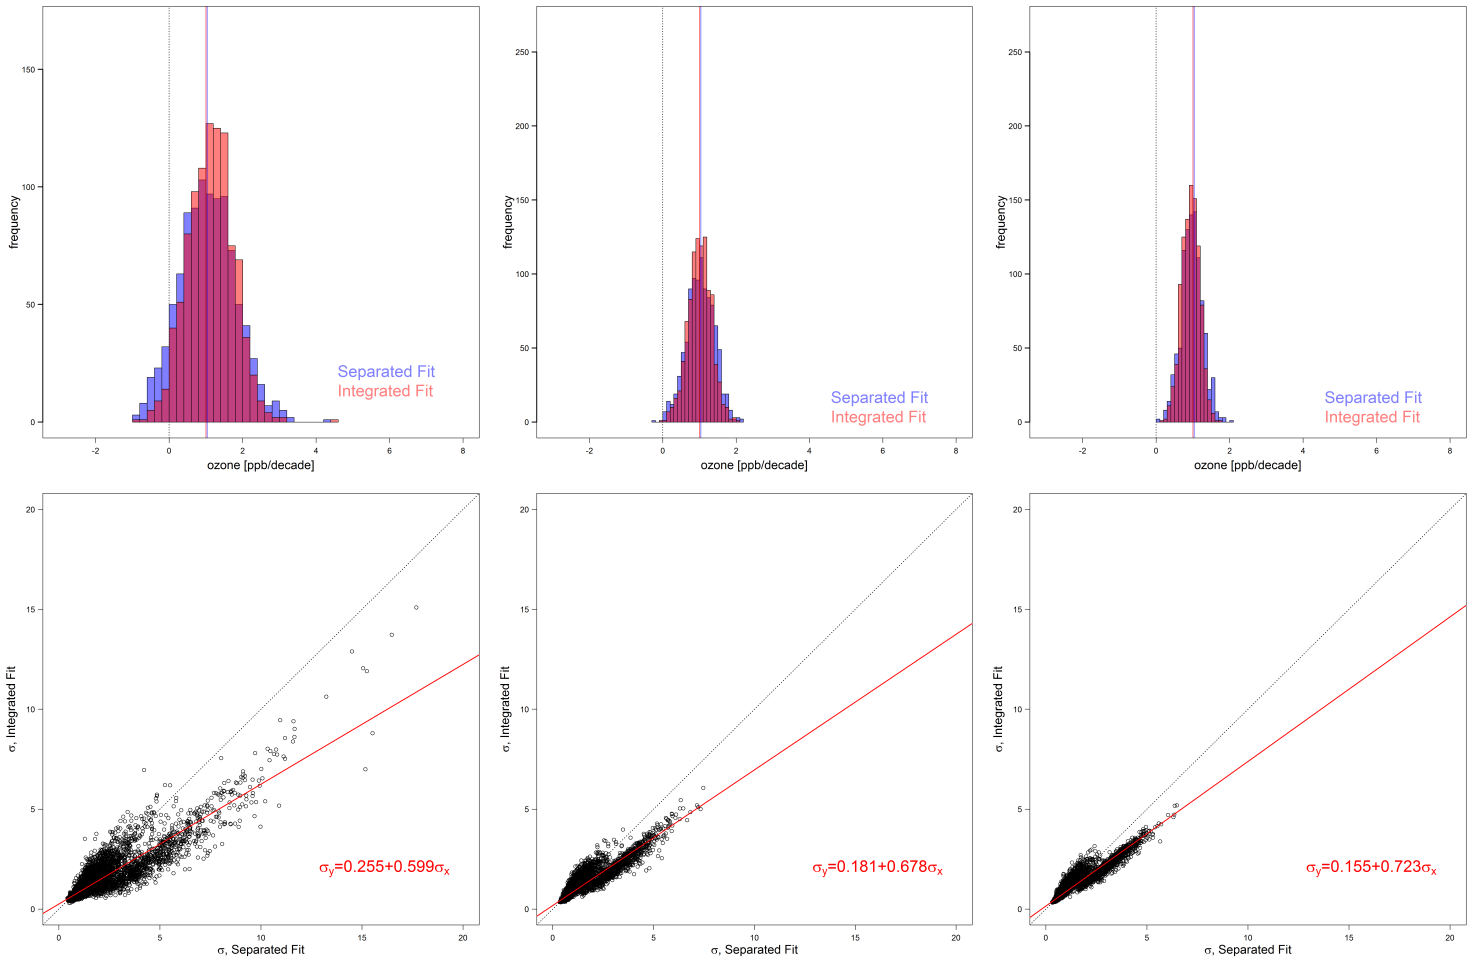

**Figure S-4:** Sensitivity analysis at 550 hPa based on 1000 random samples of 1 (left), 5 (middle) and 9 (right) selected profiles per month. Shown are the sampled trend distributions with vertical lines indicating the trend values derived from the full data set (top), and the corresponding matched trend uncertainties based on the separated and integrated fits (bottom).

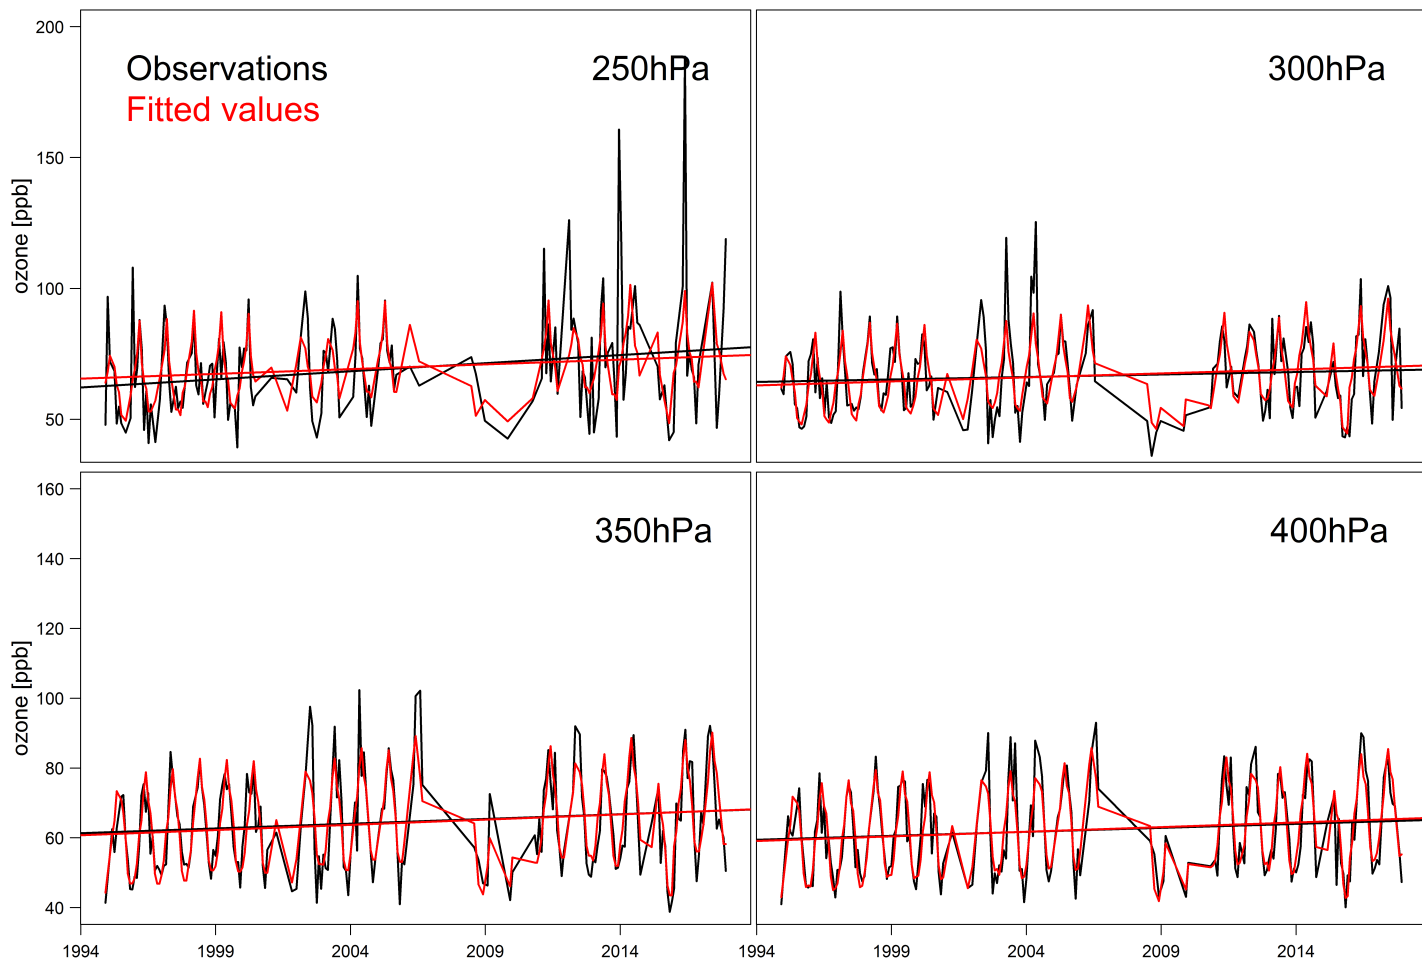

**Figure S-5:** Monthly mean ozone time series and model fitted values on 4 upper-level layers above NE China.

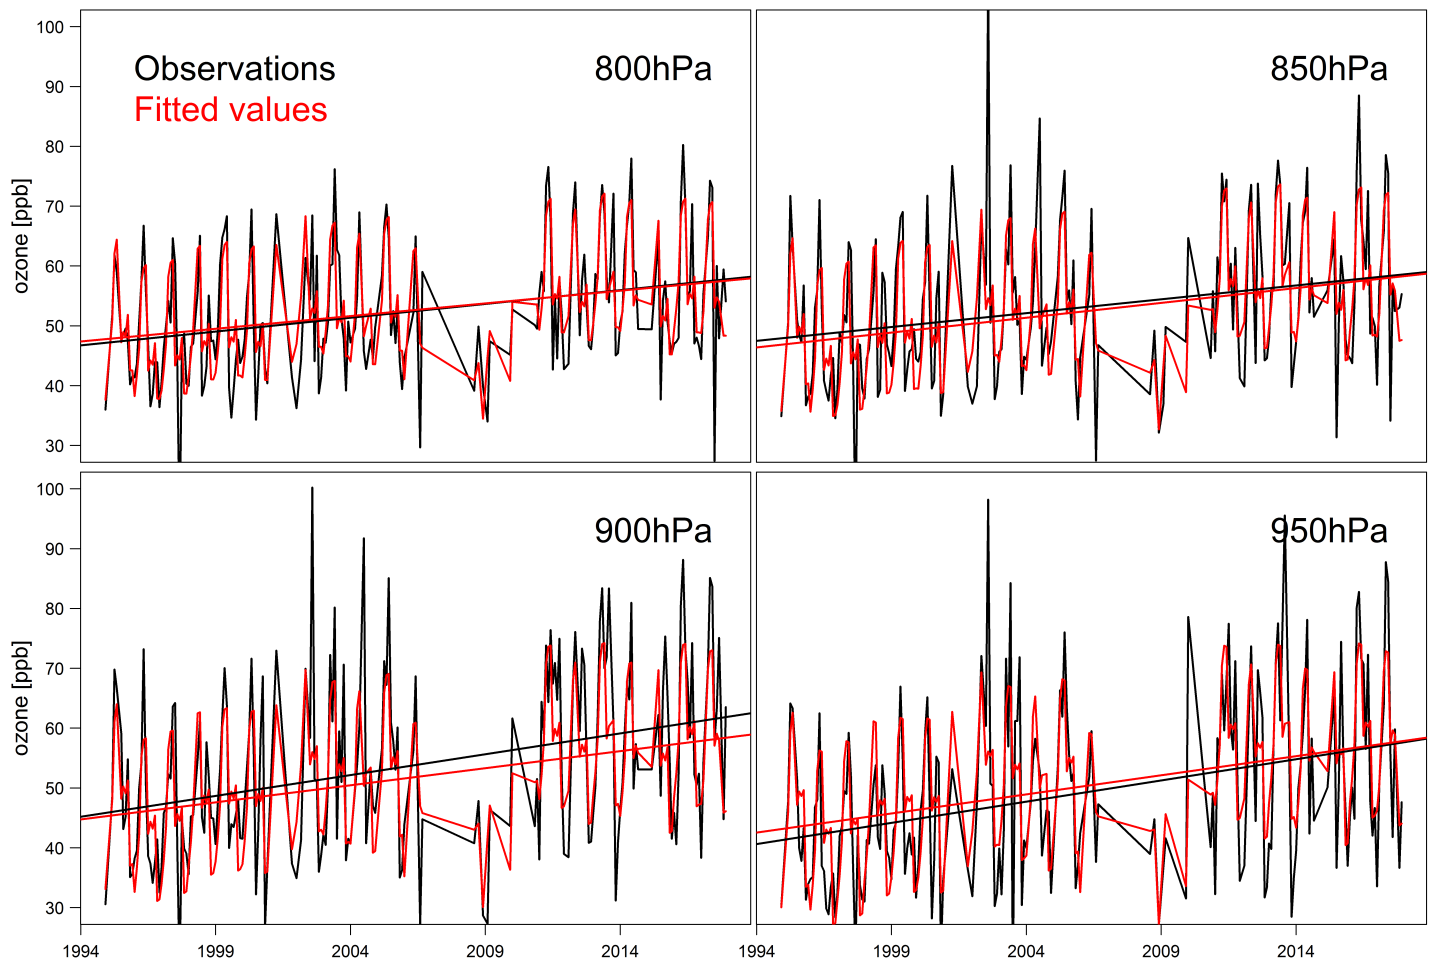

**Figure S-6:** Monthly mean ozone time series and model fitted values on 4 lower-level layers above NE China.



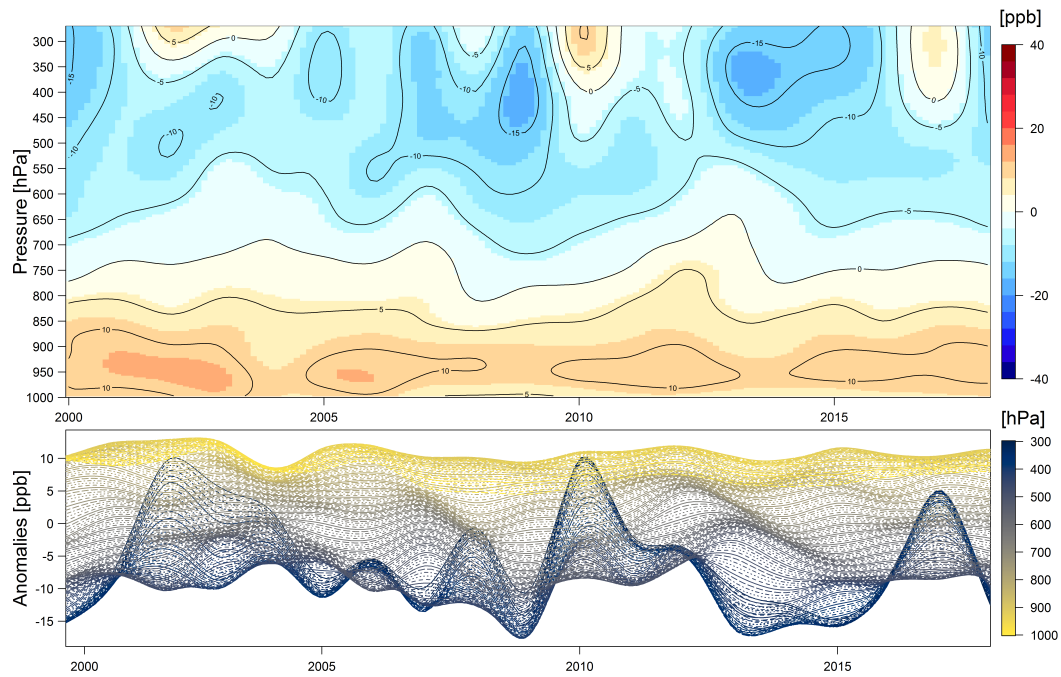

(a) Interannual component

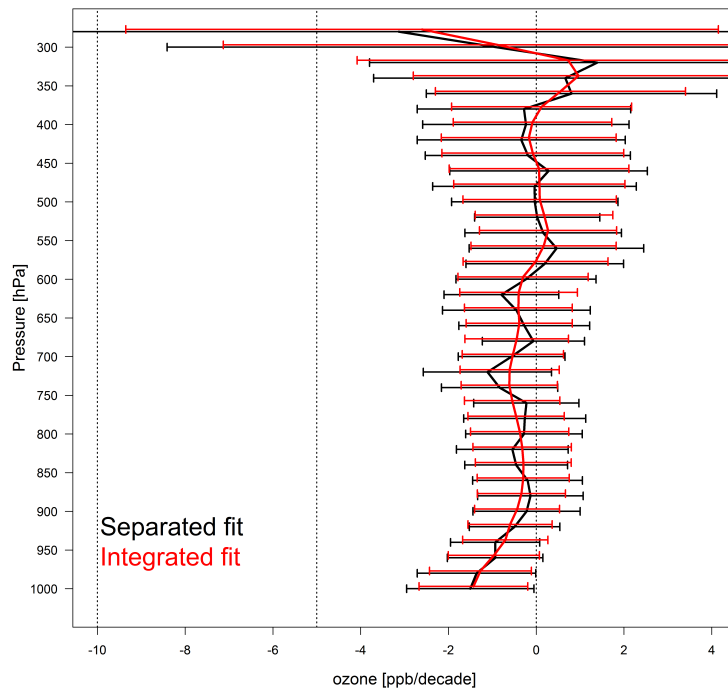

(b) Trend estimates (2000-2018)

**Figure S-7:** (a) Interannual component for the ozone distribution and (b) trend estimates and associated 2-sigma variabilities at 20 hPa vertical resolution, based on the separated fit and integrated fit methods above Trinidad Head, California.

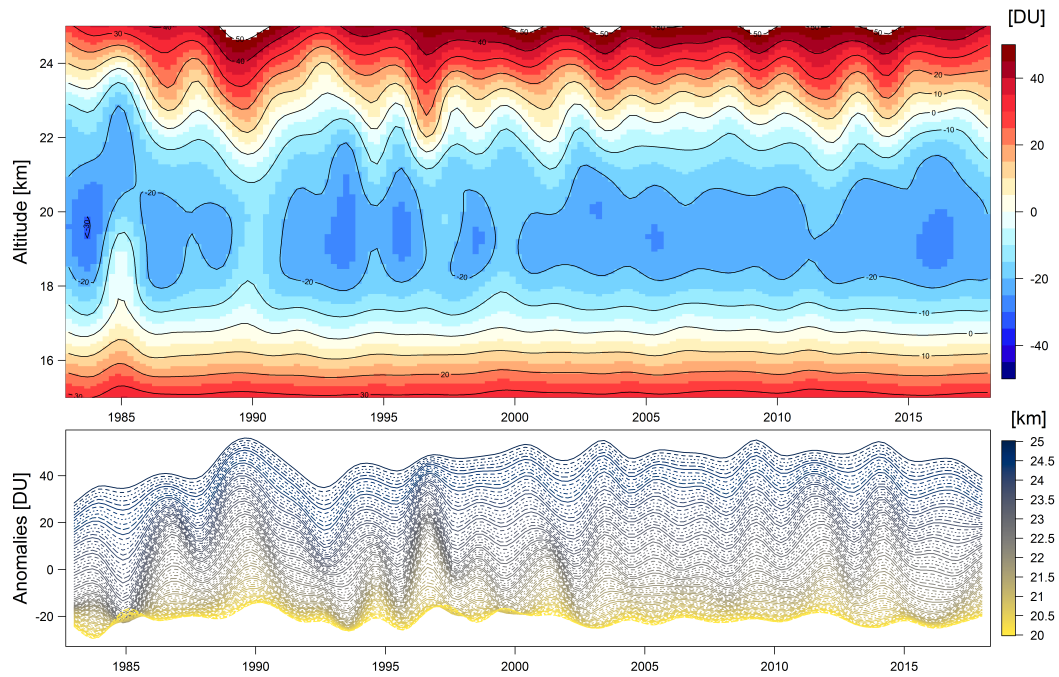

(a) Interannual component

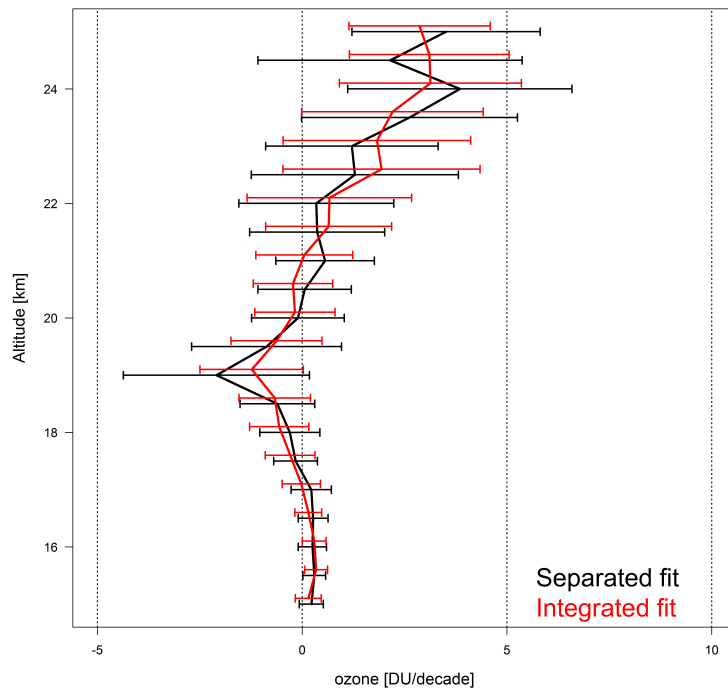

(b) Trend estimates (1982-2018)

**Figure S-8:** (a) Interannual component for stratospheric ozone observation and (b) trend estimates and associated 2-sigma variabilities at 0.5 km vertical resolution, based on the separated fit and integrated fit methods above Hilo, Hawaii.
